# Supplementary material for: Genome Sequencing and Analysis of Nigrospora oryzae, a Rice Leaf Disease Fungus
Source: J Fungi (Basel). 2024 Jan 26;10(2):100. doi: 10.3390/jof10020100 (PMC10890021; doi:10.3390/jof10020100)
Supplement: Supplementary file 1 [file jof-10-00100-s001.zip]

Archive with 8 entries (8 files):
- Figure and Table.pdf
- Figure S1.png
- Figure S2.png
- Figure S3.png
- Figure S4.png
- Figure S5.png
- Figure S6.png
- TableS1-S8.xls
