# Supplementary material for: Genome Sequencing and Analysis of Nigrospora oryzae, a Rice Leaf Disease Fungus
Source: J Fungi (Basel). 2024 Jan 26;10(2):100. doi: 10.3390/jof10020100 (PMC10890021; doi:10.3390/jof10020100)
Supplement: Supplementary file 1 [file jof-10-00100-s001.zip › TableS1-S8.xls]

## Sheet: Table S1
TableS1 Raw data and Clean reads data statistics table
Data type	SeqNum	SumBase	N50Len	N90Len	MeanLen	MaxLen	MeanQual
Raw data	974080	7729184964	-	-	-	-	-
Clean data	655976	7125968880	16130	5042	10863	124071	9.2

## Sheet: Table S2
Table S2 Clean reads length distribution table
Length (bp)	Reads Number	Total Length (bp)	Percent	Average Length（bp）
0~2000	0	0	0	0
2000~5000	220948	703788686	0.0987	3185.31
5000~10000	136419	989320639	0.1388	7252.07
10000~20000	207852	3016834901	0.4233	14514.3
20000~30000	71581	1701648809	0.2387	23772.3
30000~40000	14347	483794735	0.0678	33721
40000~50000	3505	154084638	0.0216	43961.4
50000~60000	965	52034660	0.0073	53921.9
60000~70000	262	16789206	0.0023	64080.9
70000~80000	67	4967624	0.0006	74143.6
>=80000	30	2704982	0.0003	90166.1

## Sheet: Table S3
Table S3 BUSCO evaluation statistics
Complete BUSCOs(C)	Complete and single-copy BUSCOs(S)	Complete and duplicated BUSCOs(D)	Fragmented BUSCOs(F)	Missing BUSCOs(M)	Total Lineage BUSCOs
287 (98.97%)	285 (98.28%)	2 (0.69%)	1 (0.34%)	2 (0.69%)	290

## Sheet: TableS4
Table S4 Next generation sequencing data return rate evaluation
Library	Mapped(%)	Properly mapped(%)	Coverage(%)	Depth(X)
350bp	95.99	94.68	99.89	69.86

## Sheet: Table S5
Table S5 Gene prediction results statistics
Method	Software	Species	Gene number
Ab initio based	Augustus		9285
	Genscan		9654
	GeneID		16553
	GlimmerHMM		10479
	SNAP		11308
RNA-seq based	PASA		19416
	TransDecoder		23066
Homology based	GeMoMa	Fusarium oxysporum	8834
		Magnaporthe oryzae	8429
		Verticillium dahliae	8087
Integration	EVM		10688

## Sheet: Table S6
			Table S6 Statistics of basic gene information
			Name	length or Nnumber
			AveGenlength	2356.59
			ExonLength	22999793
			AveExonLength	726
			ExonNumber	31680
			AveExonNumber	2.96
			CDSLength	16298562
			AveCDSlength	528.4
			CDSNumber	30845
			AveCDSNumber	2.89
			IntronLength	2187456
			AveIntronLength	104.2
			IntronNumber	20992
			AveIntroNnumber	1.96

## Sheet: Table S7
Table S7 Gene function annotation statistics
Database	Number	100<=length<300	length>=300
GO Annotation	4309	879	3353
KEGG Annotation	3314	767	2483
KOG Annotation	5503	1041	4400
Pfam Annotation	7938	1626	6219
Swissprot Annotation	6551	1267	5193
TrEMBL Annotation	10253	2456	7618
Nr Annotation	10244	2455	7610
All Annotated	10268	2463	7626

## Sheet: Table S8
Table S8 The number of co-linear genes in each scaffold of ZQ1.
scaffold ID	Number	Scaffold ID	Number
scaffold 1	1143	scaffold 14	—
scaffold 2	471	scaffold 15	—
scaffold 3	443	scaffold 16	25
scaffold 4	338	scaffold 17	16
scaffold 5	444	scaffold 18	—
scaffold 6	137	scaffold 19	12
scaffold 7	120	scaffold 20	1090
scaffold 8	121	scaffold 21	933
scaffold 9	199	scaffold 22	712
scaffold 10	122	scaffold 23	720
scaffold 11	86	scaffold 24	500
scaffold 12	1029	scaffold 25	545
scaffold 13	23	scaffold 26	493
